# Supplementary material
Source: HighWire-hosted journal article supplement (https://bmjopen.bmj.com/content/10/12/e035805)
Supplement: inline-supplementary-material-1 [file inline-supplementary-material-1.pdf]

Supplement Table 1. Demographic, Health-Related Behaviors and General Health Characteristics of Participants Included and Excluded in the Analysis

| Characteristics                   | No. of Excluded<br>Subjects, n = 1,984 (%) | No. of Included<br>Subjects, n = 4,813 (%) | Unadjusted<br>P Value <sup>a</sup> |
|-----------------------------------|--------------------------------------------|--------------------------------------------|------------------------------------|
| Age (SE), yrs                     | 61.0 ± 0.54                                | 55.8 ± 0.36                                | <b>&lt;0.001</b>                   |
| Gender                            |                                            |                                            |                                    |
| Male                              | 930 (44.5)                                 | 2,443 (48.0)                               | <b>0.03</b>                        |
| Female                            | 1,054 (55.5)                               | 2,370 (52.0)                               |                                    |
| Race                              |                                            |                                            |                                    |
| Non-Hispanic white                | 995 (72.5)                                 | 2,551 (76.6)                               | <b>0.02</b>                        |
| Other                             | 989 (27.5)                                 | 2,262 (23.4)                               |                                    |
| Education                         |                                            |                                            |                                    |
| Less than high school             | 784 (26.9)                                 | 1,357 (17.0)                               | <b>&lt;0.001</b>                   |
| High school and over              | 1,200 (73.1)                               | 3,456 (83.0)                               |                                    |
| Marital status                    |                                            |                                            |                                    |
| Unmarried and other               | 857 (36.0)                                 | 1,719 (30.8)                               | <b>&lt;0.001</b>                   |
| Married/with a partner            | 1,123 (64.0)                               | 3,092 (69.3)                               |                                    |
| Poverty income ratio (PIR)        |                                            |                                            |                                    |
| Below poverty (<1)                | 349 (13.0)                                 | 695 (8.9)                                  | <b>&lt;0.001</b>                   |
| At or above poverty (≥1)          | 1,424 (87.0)                               | 3,800 (91.1)                               |                                    |
| Smoking status                    |                                            |                                            |                                    |
| Never                             | 982 (49.0)                                 | 2,313 (49.4)                               | 0.79                               |
| Former/Current                    | 996 (51.0)                                 | 2,499 (50.6)                               |                                    |
| Alcohol consumption               |                                            |                                            |                                    |
| Lifetime abstainer/former drinker | 483 (26.2)                                 | 1,152 (20.4)                               | <b>0.001</b>                       |
| Current drinker<br>(≤ 3 drinks/w) | 795 (54.6)                                 | 2,538 (55.0)                               |                                    |

|                                |              |              |                  |
|--------------------------------|--------------|--------------|------------------|
| Current drinker                | 263 (19.2)   | 1,011 (24.6) |                  |
| (> 3 drinks/w)                 |              |              |                  |
| DM                             |              |              |                  |
| No                             | 1,292 (77.3) | 3,833 (87.2) | <b>&lt;0.001</b> |
| Yes                            | 538 (22.7)   | 858 (12.8)   |                  |
| HBP                            |              |              |                  |
| No                             | 687 (45.0)   | 2,446 (58.1) | <b>&lt;0.001</b> |
| Yes                            | 1,050 (55.0) | 2,289 (41.9) |                  |
| High cholesterol               |              |              |                  |
| No                             | 1,047 (57.8) | 2,895 (63.2) | <b>0.003</b>     |
| Yes                            | 773 (42.2)   | 1,789 (36.8) |                  |
| BMI                            |              |              |                  |
| < 18.5kg/m <sup>2</sup>        | 31 (1.6)     | 72 (1.4)     |                  |
| 18.5-25 kg/m <sup>2</sup>      | 473 (26.1)   | 1,188 (27.2) | 0.62             |
| ≥ 25 kg/m <sup>2</sup>         | 1,358 (72.3) | 3,516 (71.4) |                  |
| High C-reactive protein        |              |              |                  |
| No                             | 1,539 (87.8) | 4,133 (89.7) | 0.06             |
| Yes                            | 234 (12.2)   | 523 (10.3)   |                  |
| Self-rated health              |              |              |                  |
| Poor/Fair                      | 556 (26.9)   | 1,174 (17.9) | <b>&lt;0.001</b> |
| Good/Excellent                 | 999 (73.1)   | 3,540 (82.1) |                  |
| Physical activity              |              |              |                  |
| (Meeting recommendation)       |              |              |                  |
| No                             | 810 (44.2)   | 1,474 (30.9) | <b>&lt;0.001</b> |
| Yes                            | 719 (55.8)   | 2,451 (69.1) |                  |
| Chronic kidney disease         |              |              |                  |
| No                             | 1,357 (81.8) | 4,046 (90.2) | <b>&lt;0.001</b> |
| Yes                            | 401 (18.2)   | 579 (9.8)    |                  |
| Cardiovascular disease history |              |              |                  |

---

|     |             |              |                  |
|-----|-------------|--------------|------------------|
| No  | 1,491(79.7) | 4,138 (89.1) | <b>&lt;0.001</b> |
| Yes | 493 (20.3)  | 675 (10.9)   |                  |

Abbreviations: SE, standard error; DM, diabetes mellitus; HBP, high blood pressure; BMI, body mass index. Boldface indicates statistical significance.

All proportions are weighted estimates of the US population characteristics, taking into account the complex sampling design of the National Health and Nutrition Examination Survey.

<sup>a</sup> All P values were calculated using t-test for continuous variables and the design-adjusted Rao-Scott Pearson  $\chi^2$  test for categorical variables.

---
